# Supplementary material
Source: PubMed Central journal article supplement (PMC3690555)
Supplement: NIHMS462484-supplement-001.pdf [file NIHMS462484-supplement-001.pdf]

# The Role of Conserved Tyrosine Residues in NiSOD Catalysis: A Case of Convergent Evolution

*Robert W. Herbst, Abigail Guce, Peter A. Bryngelson, Khadine A. Higgins, Kelly C. Ryan*

*Diane E. Cabelli, Scott Garman\* and Michael J. Maroney<sup>†</sup>\**

## **SUPPORTING INFORMATION**

```

Streptomyces coelicolor      -----MLSRLFAPKVTVSAHCDLPCGVYDPAQARIEAESVKAVQEKMAGNDD
Streptomyces seoulensis    -----MLSRLFAPKVKVSAHCDLPCGVYDPAQARIEAESVKAIQEKMAANDD
Synechococcus sp.         -----MLRSALTALVRALPCPAEEAHCDGPCGVYDPASARVAEEAVLSMTKKLKAMEA
Prochlorococcus marinus    MFTNYSQMLSETLTSIFKKLPAKSVHAHCDGPCGVYDPSSARVTAEEAVLSMTKKLIALAP
Plesiocystis pacifica     -----MFDRIKKSILDAAPR--AEAHCDDGPCGIYDPAAARITGEAVRSMTKKILALTP
Trichodesmium erythraeum  MGISLKIMLNTIATQIRKWFSAPEVSAHCDGPCGVYDPASARIYAEAVLSMTKKIILDLP

Streptomyces coelicolor    P-----HFQTRATVIKEQRAELAKHHVSVLWSDYFKPPHFEEKYPELHQLVNDT
Streptomyces seoulensis    L-----HFQIRATVIKEQRAELAKHHLVDLWSDYFKPPHFESYPELHTLVNEA
Synechococcus sp.         PAAGDAAALAYNNTFGRYVAIKEEEAQKTKKELLIWTDYFKPEHLATFPDLHDTFWKA
Prochlorococcus marinus    -AGNDQASISAYNNTFSRFVAIKEEESQKAKKELLIWTDYFKPEHLATYFDLHDTFWKA
Plesiocystis pacifica     PDPDAAEAVARYHNTLSRYVAIKEEQAEHTKRELLIWLTDYFKPPHLEKPNPIHELFWKA
Trichodesmium erythraeum  KAG----DHKTANTLSRYIAIKEEQAQKTKEDLLIWLTDYFKPVHLEKYFDLHDTFWKA

Streptomyces coelicolor    LKALSAAGSKDPATGQKALDYIAQIDKIFWETKKA-----
Streptomyces seoulensis    VKALSAAKASTDPATGQKALDYIAQIDKIFWETKKA-----
Synechococcus sp.         AKLCSACKVNIQAKAEELMAAVEKVHGMFWQSKGRSDAWVTAS-
Prochlorococcus marinus    AKLCSACKVNIQTKAEELLAAVQKIHSMEFWSSKGRSDSWVTAS-
Plesiocystis pacifica     AKLCSACKVEVSAQHAEDELMDAIKEIHDVFWATKGREVAWVLAGG
Trichodesmium erythraeum  AKLCSACKVEVSLHATELLAAVEKIHNMFWATKERDVTWYKAS-

```

**Figure S1.** Amino acid sequence alignment of NiSODs. Strictly conserved residues are colored; green residues are the topic of this paper. The boxed residues constitute the “Ni hook” domain. The N-terminus of the mature polypeptide is indicated by the arrow, and residue numbering in the text begins with this residue.

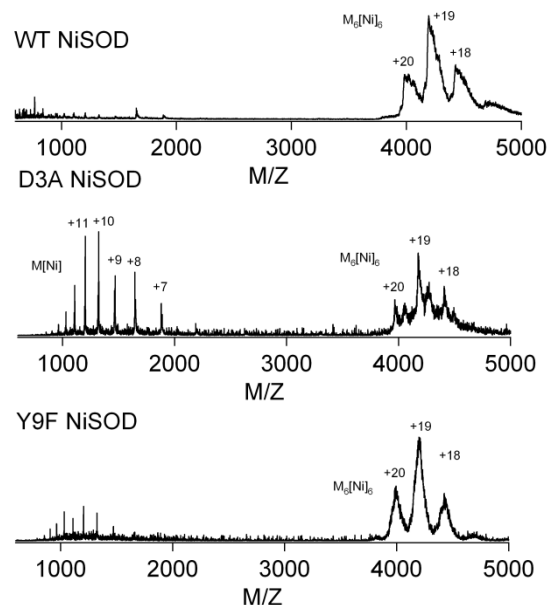

**Figure S2.** ESI-MS taken under non-denaturing conditions. Monomeric species correspond to peaks centered at  $M/Z \sim 1500$ , and hexameric species correspond to  $M/Z \sim 3800 - 4500$ .

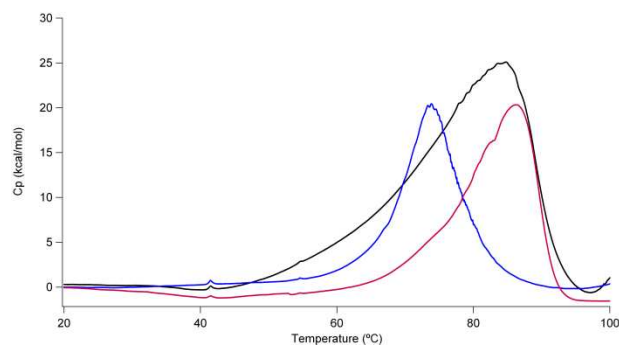

**Figure S3.** DSC Thermograms. Black – WT-NiSOD; Blue – D3A-NiSOD; Red – Y9F-NiSOD.

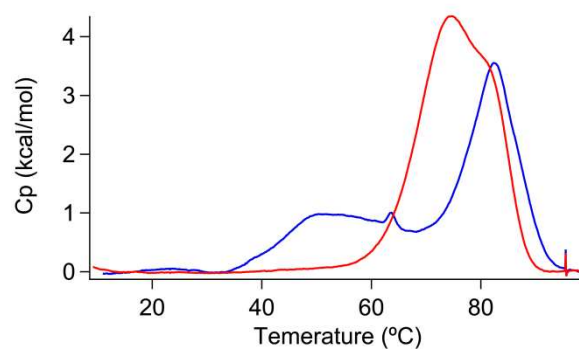

**Figure S4.** DSC Thermograms. Blue – Y62F-NiSOD; Red – Y9FY62F-NiSOD.

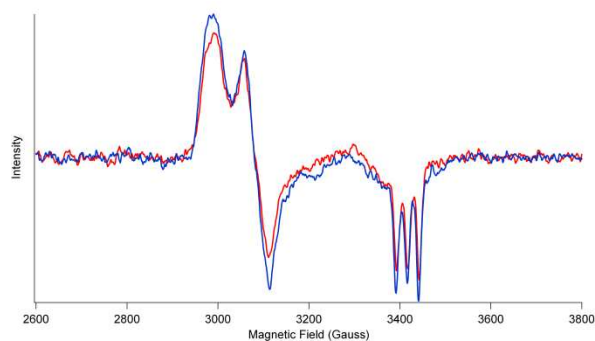

**Figure S5.** Overlay of X-band EPR spectra for as-isolated WT-NiSOD (Red) and after addition of  $\text{KMnO}_4$  (Blue).

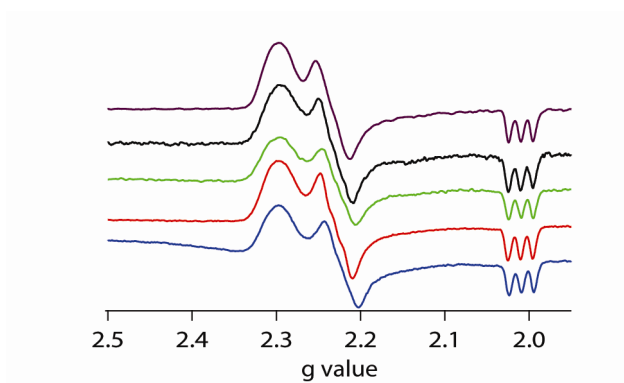

**Figure S6.** X-band EPR spectra of WT and mutant strains of NiSOD. Spectra were collected at 77K with a microwave frequency of 9.46 GHz. WT-(Blue), Y9F-NiSOD (Red), Y62F-NiSOD (Green), Y9FY62F-NiSOD (Black), and D3A-NiSOD (Purple).

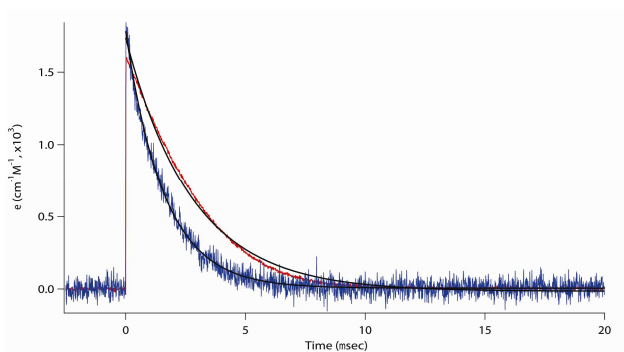

**Figure S7.** Kinetic data monitoring the disappearance of superoxide at 260 nm. The red trace is the activity of Y9F-NiSOD when 48.3 mM of  $O_2^-$  is generated. The blue trace is the activity of Y9F-NiSOD when 6.47 mM of  $O_2^-$  is generated. The black traces are both first-order fits to the data. A first-order fit is not sufficient to fit the data when large amounts of  $O_2^-$  are generated. This is because of saturation effects. Product inhibition can be ruled out because the data depicted by the blue trace (low substrate concentration) was taken on the same sample after the data in the red trace, and thus more products were present.

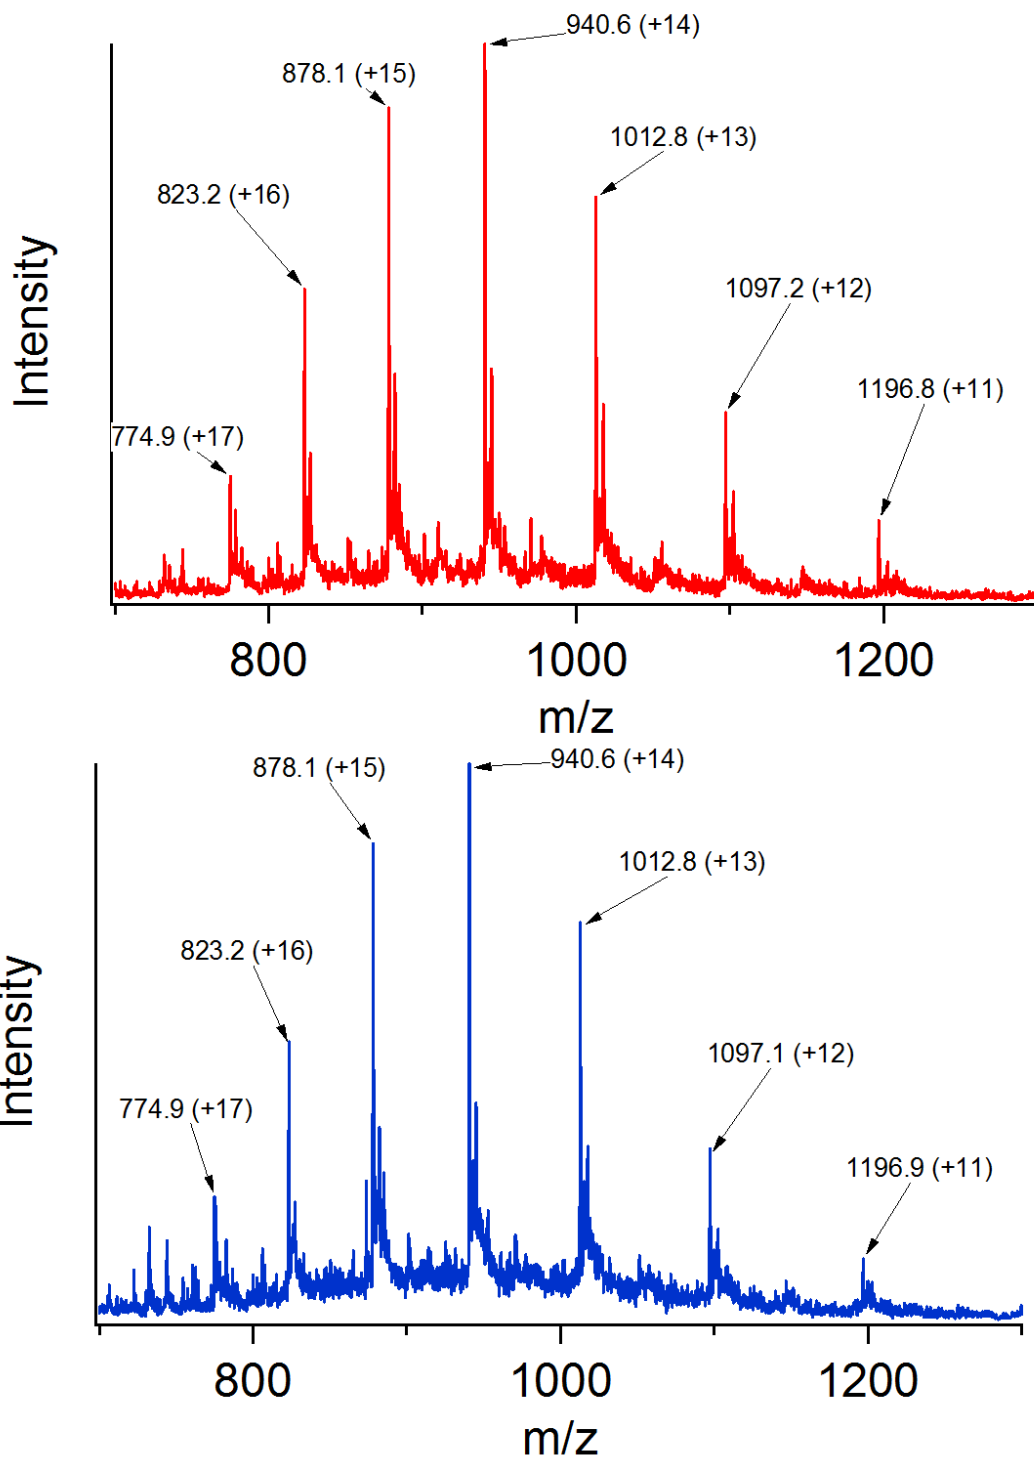

**Figure S8.** ESI-MS of D3A-NiSOD before (red, top) and after (blue, bottom) reaction with  $\text{H}_2\text{O}_2$ .

Table S1. Y9F First Shell XAS Fits

| <b>Ni-N 2.00</b>           |          |                                                 |           |                |                 |
|----------------------------|----------|-------------------------------------------------|-----------|----------------|-----------------|
|                            | <b>R</b> | <b><math>\sigma^2</math> (x10<sup>-3</sup>)</b> | <b>E0</b> | <b>red chi</b> | <b>r-factor</b> |
| <b>3N</b>                  | 2.04(2)  | 6(2)                                            | 0(3)      | 58.2           | 0.2752          |
| <b>4N</b>                  | 2.03(2)  | 9(2)                                            | -2(3)     | 55.1           | 0.2609          |
| <b>5N</b>                  | 2.02(2)  | 11(2)                                           | -3(3)     | 57.54          | 0.2723          |
| <b>6N</b>                  | 2.01(3)  | 13(2)                                           | -4(3)     | 62.8           | 0.297           |
| <b>Ni-S 2.30</b>           |          |                                                 |           |                |                 |
|                            | <b>R</b> | <b><math>\sigma^2</math> (x10<sup>-3</sup>)</b> | <b>E0</b> | <b>red chi</b> | <b>r-factor</b> |
| <b>2S</b>                  | 2.16(3)  | 8(1)                                            | -12(5)    | 51.2           | 0.2423          |
| <b>3S</b>                  | 2.16(2)  | 11(1)                                           | -14(4)    | 44             | 0.2082          |
| <b>4S</b>                  | 2.15(2)  | 14(1)                                           | -16(4)    | 43.5           | 0.2057          |
| <b>5S</b>                  | 2.14(2)  | 16(2)                                           | -17(4)    | 45.9           | 0.217           |
| <b>6S</b>                  | 2.14(3)  | 18(2)                                           | -18(4)    | 49.5           | 0.2343          |
| <b>Ni-N 2.00 Ni-S 2.30</b> |          |                                                 |           |                |                 |
|                            | <b>R</b> | <b><math>\sigma^2</math> (x10<sup>-3</sup>)</b> | <b>E0</b> | <b>red chi</b> | <b>r-factor</b> |
| <b>2N</b>                  | 1.88(6)  | 9(5)                                            |           |                |                 |
| <b>2S</b>                  | 2.18(3)  | 7(2)                                            | -14(6)    | 63.7           | 0.1497          |
| <b>3N</b>                  | 2.0(2)   | 21(12)                                          |           |                |                 |
| <b>2S</b>                  | 2.17(4)  | 9(4)                                            | -11(12)   | 67.5           | 0.1588          |
| <b>3N</b>                  | 1.96(3)  | 9(3)                                            |           |                |                 |
| <b>1S</b>                  | 2.24(3)  | 4(2)                                            | -7(4)     | 37.4           | 0.0661          |
| <b>1S</b>                  | 2.54(3)  | 7(4)                                            |           |                |                 |

Table S2. Y62F First Shell XAS Fits

| <b>Ni-N 2.00</b>         |          |                                                 |           |                |                 |
|--------------------------|----------|-------------------------------------------------|-----------|----------------|-----------------|
|                          | <b>R</b> | <b><math>\sigma^2</math> (x10<sup>-3</sup>)</b> | <b>E0</b> | <b>red chi</b> | <b>r-factor</b> |
| <b>3N</b>                | 2.03(2)  | 4(1)                                            | 1(2)      | 32.8           | 0.1081          |
| <b>4N</b>                | 2.03(2)  | 7(2)                                            | -1(3)     | 39.21          | 0.1292          |
| <b>5N</b>                | 2.03(2)  | 9(2)                                            | -2(3)     | 54.3           | 0.1789          |
| <b>6N</b>                | 2.02(3)  | 12(3)                                           | -3(3)     | 72.7           | 0.2396          |
| <b>Ni-S 2.30</b>         |          |                                                 |           |                |                 |
|                          | <b>R</b> | <b><math>\sigma^2</math> (x10<sup>-3</sup>)</b> | <b>E0</b> | <b>red chi</b> | <b>r-factor</b> |
| <b>2S</b>                | 2.14(2)  | 6(1)                                            | -14(4)    | 26.7           | 0.0884          |
| <b>3S</b>                | 2.14(2)  | 10(1)                                           | -15(4)    | 25.4           | 0.0837          |
| <b>4S</b>                | 2.14(2)  | 12(1)                                           | -16(4)    | 33.4           | 0.11            |
| <b>Ni-N 2.0 Ni-S 2.2</b> |          |                                                 |           |                |                 |
|                          | <b>R</b> | <b><math>\sigma^2</math> (x10<sup>-3</sup>)</b> | <b>E0</b> | <b>red chi</b> | <b>r-factor</b> |
| <b>2N</b>                | 1.9(2)   | 21(16)                                          |           |                |                 |
| <b>2S</b>                | 1.15(3)  | 6(2)                                            | -14(7)    | 27.8           | 0.0645          |
| <b>3N</b>                | 2.0(3)   | 30(18)                                          | -12(9)    | 27.3           | 0.0635          |

|           |         |        |        |      |        |
|-----------|---------|--------|--------|------|--------|
| <b>2S</b> | 2.15(3) | 7(2)   |        |      |        |
| <b>2N</b> |         |        |        |      |        |
| <b>3S</b> |         |        |        |      | N/A    |
| <b>4N</b> | 2.07(6) | 15(7)  |        |      |        |
| <b>1S</b> | 2.18(1) | 4(2)   | -2(5)  | 17.9 | 0.0417 |
| <b>3N</b> | 1.8(2)  | 39(51) |        |      |        |
| <b>3S</b> | 2.14(3) | 9(2)   | -17(6) | 34   | 0.0792 |
| <b>4N</b> | 2.09(9) | 5(4)   |        |      |        |
| <b>2S</b> | 2.13(6) | 8(8)   | -2(4)  | 20.2 | 0.047  |
| <b>5N</b> | 2.09(5) | 19(6)  |        |      |        |
| <b>1S</b> | 2.18(1) | 3(1)   | -1(4)  | 16.1 | 0.0373 |

**Ni-N 1.8 Ni-N 2.0**

|           | <b>R</b> | <b><math>\sigma^2</math> (x10<sup>-3</sup>)</b> | <b>E0</b> | <b>red chi</b> | <b>r-factor</b> |
|-----------|----------|-------------------------------------------------|-----------|----------------|-----------------|
| <b>2N</b> | 1.93(3)  | 4(4)                                            |           |                |                 |
| <b>2N</b> | 2.06(2)  | 7e-7(2)                                         | -2(3)     | 32.2           | 0.0759          |
| <b>2N</b> | 1.90(6)  | 9(9)                                            |           |                |                 |
| <b>3N</b> | 2.04(2)  | 3(3)                                            | -4(3)     | 46             | 0.1071          |
| <b>3N</b> | 1.94(5)  | 10(7)                                           |           |                |                 |
| <b>2N</b> | 2.05(2)  | 1(2)                                            | -4(3)     | 42.6           | 0.0991          |
| <b>3N</b> | 1.90(8)  | 20(17)                                          |           |                |                 |
| <b>3N</b> | 2.03(2)  | 4(2)                                            | -4(4)     | 52.7           | 0.1226          |
| <b>4N</b> | 1.94(7)  | 17(10)                                          |           |                |                 |
| <b>2N</b> | 2.04(2)  | 1(2)                                            | -5(4)     | 52             | 0.121           |

**Ni-S 2.2 Ni-S 2.4**

|           | <b>R</b> | <b><math>\sigma^2</math> (x10<sup>-3</sup>)</b> | <b>E0</b> | <b>red chi</b> | <b>r-factor</b> |
|-----------|----------|-------------------------------------------------|-----------|----------------|-----------------|
| <b>2S</b> | 2.16(2)  | 6(1)                                            |           |                |                 |
| <b>2S</b> | 2.4(1)   | 32(33)                                          | -11(6)    | 27.6           | 0.0641          |
| <b>3S</b> | 2.16(2)  | 9(1)                                            |           |                |                 |
| <b>2S</b> | 2.45(4)  | 19(7)                                           | -10(3)    | 18.9           | 0.0439          |
| <b>3S</b> | 2.17(2)  | 8.5(9)                                          |           |                |                 |
| <b>3S</b> | 2.45(4)  | 24(7)                                           | -9(3)     | 15.5           | 0.0359          |
| <b>4S</b> | 2.18(2)  | 11(1)                                           |           |                |                 |
| <b>2S</b> | 2.47(3)  | 14(4)                                           | -11(3)    | 16.2           | 0.0376          |

Table S3. Y9FY62F First Shell XAS Fits

| <b>Ni-N 2.00</b> |          |                                                 |           |                |                 |
|------------------|----------|-------------------------------------------------|-----------|----------------|-----------------|
|                  | <b>R</b> | <b><math>\sigma^2</math> (x10<sup>-3</sup>)</b> | <b>E0</b> | <b>red chi</b> | <b>r-factor</b> |
| <b>3N</b>        | 2.06(2)  | 4(2)                                            | 1(3)      | 59.3           | 0.2331          |
| <b>4N</b>        | 2.06(3)  | 7(3)                                            | 0(3)      | 75.4           | 0.2966          |
| <b>5N</b>        | 2.05(4)  | 11(4)                                           | -1(4)     | 93.7           | 0.3683          |
| <b>6N</b>        | 2.05(6)  | 16(6)                                           | -1(4)     | 108.7          | 0.4274          |

| <b>Ni-S 2.30</b> |          |                                                 |           |                |                 |
|------------------|----------|-------------------------------------------------|-----------|----------------|-----------------|
|                  | <b>R</b> | <b><math>\sigma^2</math> (x10<sup>-3</sup>)</b> | <b>E0</b> | <b>red chi</b> | <b>r-factor</b> |
| <b>2S</b>        | 2.16(3)  | 6(2)                                            | -14(6)    | 76.2           | 0.2994          |
| <b>3S</b>        | 2.16(4)  | 10(3)                                           | -15(7)    | 89.9           | 0.3532          |
| <b>4S</b>        | 2.16(5)  | 14(3)                                           | -16(7)    | 102.5          | 0.4029          |

| <b>Ni-N 2.0 Ni-S 2.2</b> |          |                                                 |           |                |                 |
|--------------------------|----------|-------------------------------------------------|-----------|----------------|-----------------|
|                          | <b>R</b> | <b><math>\sigma^2</math> (x10<sup>-3</sup>)</b> | <b>E0</b> | <b>red chi</b> | <b>r-factor</b> |
| <b>2N</b>                | 2.07(5)  | 9e-7(3)                                         |           |                |                 |
| <b>2S</b>                | 2.10(5)  | 7(8)                                            | -12(10)   | 88.1           | 0.1781          |
| <b>3N</b>                | 2.08(4)  | 0.4(26)                                         |           |                |                 |
| <b>2S</b>                | 2.09(4)  | 6(6)                                            | -6(7)     | 80             | 0.1617          |
| <b>2N</b>                | 1.67(9)  | 18(18)                                          |           |                |                 |
| <b>3S</b>                | 2.13(4)  | 10(2)                                           | -20(8)    | 123.9          | 0.2504          |
| <b>4N</b>                | 2.07(3)  | 3e-7(4)                                         |           |                |                 |
| <b>1S</b>                | 2.05(5)  | 1(7)                                            | 0(3)      | 48.8           | 0.0987          |
| <b>3N</b>                | 2.27(4)  | 0.1(13)                                         |           |                |                 |
| <b>3S</b>                | 2.0(3)   | 32(25)                                          | -43(16)   | 86.6           | 0.175           |
| <b>4N</b>                | 2.10(3)  | 0.3(24)                                         |           |                |                 |
| <b>2S</b>                | 2.10(3)  | 4(4)                                            | -2(3)     | 55             | 0.1111          |
| <b>5N</b>                | 2.03(3)  | 0.7(24)                                         |           |                |                 |
| <b>1S</b>                | 1.99(4)  | 3e-6(3)                                         | -2(3)     | 76.5           | 0.1546          |

| <b>Ni-N 1.8 Ni-N 2.0</b> |          |                                                 |           |                |                 |
|--------------------------|----------|-------------------------------------------------|-----------|----------------|-----------------|
|                          | <b>R</b> | <b><math>\sigma^2</math> (x10<sup>-3</sup>)</b> | <b>E0</b> | <b>red chi</b> | <b>r-factor</b> |
| <b>2N</b>                | 1.85(8)  | 17(17)                                          |           |                |                 |
| <b>3N</b>                | 2.05(2)  | 3(2)                                            | -3(5)     | 97.4           | 0.1968          |
| <b>3N</b>                | 1.85(9)  | 27(25)                                          |           |                |                 |
| <b>3N</b>                | 2.04(3)  | 4(2)                                            | -4(5)     | 99.4           | 0.201           |
| <b>4N</b>                | 2.04(3)  | 5(2)                                            |           |                |                 |
| <b>2N</b>                | 1.80(8)  | 19(18)                                          | -3(5)     | 105.4          | 0.2131          |

**Ni-S 2.2 Ni-S 2.4**



|           | <b>R</b> | <b><math>\sigma^2</math> (x10<sup>-3</sup>)</b> | <b>E0</b> | <b>red chi</b> | <b>r-factor</b> |
|-----------|----------|-------------------------------------------------|-----------|----------------|-----------------|
| <b>2S</b> | 2.19(2)  | 5(1)                                            |           |                |                 |
| <b>2S</b> | 2.44(4)  | 11(4)                                           | -8(4)     | 52.2           | 0.1055          |
| <b>2S</b> | 2.18(2)  | 5(1)                                            |           |                |                 |
| <b>3S</b> | 2.44(4)  | 17(5)                                           | -7(4)     | 48.8           | 0.0986          |
| <b>3S</b> | 2.19(2)  | 8(1)                                            |           |                |                 |
| <b>3S</b> | 2.46(3)  | 13(4)                                           | -8(4)     | 51.7           | 0.1046          |
| <b>4S</b> | 2.20(2)  | 11(2)                                           |           |                |                 |
| <b>2S</b> | 2.47(3)  | 7(3)                                            | -9(4)     | 58.1           | 0.1175          |

Table S4. D3A First Shell XAS Fits

**Ni-N 2.00**

|           | <b>R</b> | <b><math>\sigma^2</math> (x10<sup>-3</sup>)</b> | <b>E0</b> | <b>red chi</b> | <b>r-factor</b> |
|-----------|----------|-------------------------------------------------|-----------|----------------|-----------------|
| <b>3N</b> | 2.06(2)  | 2(1)                                            | 1(3)      | 65             | 0.1742          |
| <b>4N</b> | 2.06(2)  | 4(2)                                            | 0(4)      | 94.6           | 0.2534          |
| <b>5N</b> | 2.06(3)  | 7(3)                                            | -1(4)     | 129.6          | 0.3473          |
| <b>6N</b> | 2.05(4)  | 10(4)                                           | -3(5)     | 161.5          | 0.4326          |

**Ni-S 2.30**

|           | <b>R</b> | <b><math>\sigma^2</math> (x10<sup>-3</sup>)</b> | <b>E0</b> | <b>red chi</b> | <b>r-factor</b> |
|-----------|----------|-------------------------------------------------|-----------|----------------|-----------------|
| <b>2S</b> | 2.16(2)  | 4(1)                                            | -15(5)    | 51.7           | 0.1384          |
| <b>3S</b> | 2.16(3)  | 7(2)                                            | -16(5)    | 77.1           | 0.2065          |
| <b>4S</b> | 2.16(4)  | 10(2)                                           | -17(6)    | 104.3          | 0.2794          |

**Ni-N 2.0 Ni-S 2.2**

|           | <b>R</b> | <b><math>\sigma^2</math> (x10<sup>-3</sup>)</b> | <b>E0</b> | <b>red chi</b> | <b>r-factor</b> |
|-----------|----------|-------------------------------------------------|-----------|----------------|-----------------|
| <b>2N</b> | 1.80(3)  | 12(5)                                           |           |                |                 |
| <b>2S</b> | 2.14(1)  | 4.5(6)                                          | -20(3)    | 20             | 0.0329          |
| <b>3N</b> | 2.08(3)  | 2(1)                                            |           |                |                 |
| <b>2S</b> | 2.12(2)  | 8(4)                                            | -6(2)     | 16.3           | 0.0269          |
| <b>2N</b> | 2.2(2)   | 7(40)                                           |           |                |                 |
| <b>3S</b> | 2.17(2)  | 6(7)                                            | -13(12)   | 41.9           | 0.0691          |
| <b>4N</b> | 2.0(1)   | 23(8)                                           |           |                |                 |
| <b>1S</b> | 2.18(2)  | 1.5(6)                                          | -8(7)     | 13.3           | 0.022           |
| <b>3N</b> | 2.06(1)  | 1.8(9)                                          |           |                |                 |
| <b>3S</b> | 2.11(2)  | 10(3)                                           | -11(3)    | 16.3           | 0.0268          |
| <b>4N</b> | 2.09(3)  | 2(1)                                            |           |                |                 |
| <b>2S</b> | 2.11(2)  | 6(4)                                            | -5(2)     | 14.2           | 0.0234          |
| <b>5N</b> | 2.0(1)   | 28(7)                                           | -8(7)     | 14.5           | 0.0239          |

1S 2.17(2) 1.4(6)

**Ni-N 1.8 Ni-N 2.0**

|    | <b>R</b> | $\sigma^2$ ( $\times 10^{-3}$ ) | <b>E0</b> | <b>red chi</b> | <b>r-factor</b> |
|----|----------|---------------------------------|-----------|----------------|-----------------|
| 2N | 1.87(4)  | 9(7)                            |           |                |                 |
| 3N | 2.04(2)  | 2(2)                            | -7(3)     | 69.3           | 0.1142          |
| 3N | 1.88(4)  | 9(6)                            |           |                |                 |
| 3N | 2.04(2)  | 1(2)                            | -8(4)     | 112.1          | 0.1424          |
| 4N | 2.03(2)  | 3(1)                            |           |                |                 |
| 2N | 1.84(4)  | 8(6)                            | -7(3)     | 80             | 0.1319          |

**Ni-S 2.2 Ni-S 2.4**

|    | <b>R</b> | $\sigma^2$ ( $\times 10^{-3}$ ) | <b>E0</b> | <b>red chi</b> | <b>r-factor</b> |
|----|----------|---------------------------------|-----------|----------------|-----------------|
| 2S | 2.17(1)  | 4.6(6)                          |           |                |                 |
| 2S | 2.41(5)  | 24(10)                          | -11(3)    | 19.8           | 0.0326          |
| 2S | 2.17(1)  | 4.6(6)                          |           |                |                 |
| 3S | 2.42(4)  | 29(8)                           | -10(2)    | 15.5           | 0.027           |
| 3S | 2.18(1)  | 7.2(6)                          |           |                |                 |
| 3S | 2.45(2)  | 19(4)                           | -11(2)    | 17.9           | 0.0295          |
| 4S | 2.18(2)  | 9.7(9)                          |           |                |                 |
| 2S | 2.46(2)  | 10(3)                           | -13(3)    | 28.8           | 0.0474          |

Table S5. WT First Shell XAS Fits

**Ni-N 2.00**

|    | <b>R</b> | $\sigma^2$ ( $\times 10^{-3}$ ) | <b>E0</b> | <b>red chi</b> | <b>r-factor</b> |
|----|----------|---------------------------------|-----------|----------------|-----------------|
| 3N | 2.03(3)  | 6(2)                            | 0(4)      | 75.6           | 0.22            |
| 4N | 2.02(3)  | 9(3)                            | -2(4)     | 84             | 0.24            |
| 5N | 2.01(4)  | 12(3)                           | -4(4)     | 97.3           | 0.28            |
| 6N | 2.00(4)  | 15(4)                           | -6(5)     | 111.8          | 0.32            |

**Ni-S 2.30**

|    | <b>R</b> | $\sigma^2$ ( $\times 10^{-3}$ ) | <b>E0</b> | <b>red chi</b> | <b>r-factor</b> |
|----|----------|---------------------------------|-----------|----------------|-----------------|
| 2S | 2.16(3)  | 8(1)                            | -13(5)    | 49.6           | 0.14            |
| 3S | 2.15(3)  | 11(2)                           | -15(5)    | 51.6           | 0.15            |
| 4S | 2.14(3)  | 14(2)                           | -17(5)    | 59.8           | 0.1717          |

**Ni-N 2.0 Ni-S 2.2**

|    | <b>R</b> | $\sigma^2$ ( $\times 10^{-3}$ ) | <b>E0</b> | <b>red chi</b> | <b>r-factor</b> |
|----|----------|---------------------------------|-----------|----------------|-----------------|
| 2N | 1.82(6)  | 10(6)                           |           |                |                 |
| 2S | 2.15(3)  | 6(2)                            | -18(6)    | 48.9           | 0.099           |
| 3N | 2.1(4)   | 29(140)                         |           |                |                 |
| 2S | 2.17(9)  | 8(4)                            | -8(33)    | 54.3           | 0.11            |

|           |         |           |        |      |       |
|-----------|---------|-----------|--------|------|-------|
| <b>2N</b> | 2.08(2) | 1.5e-6(2) |        |      |       |
| <b>3S</b> | 2.10(2) | 9(2)      | -13(5) | 26.5 | 0.054 |
| <b>4N</b> | 1.90(8) | 18(6)     |        |      |       |
| <b>1S</b> | 2.17(2) | 3(2)      | -14(6) | 37   | 0.075 |
| <b>3N</b> | 2.09(2) | 1.5e-6(1) |        |      |       |
| <b>3S</b> | 2.10(2) | 7(2)      | -12(4) | 22   | 0.045 |
| <b>4N</b> | 2.16(6) | 21(22)    |        |      |       |
| <b>2S</b> | 2.19(3) | 8(2)      | -2(8)  | 48.5 | 0.098 |
| <b>5N</b> | 2.1(2)  | 30(15)    |        |      |       |
| <b>1S</b> | 2.18(3) | 3(1)      | 4(11)  | 37.7 | 0.076 |

**Ni-N 1.8 Ni-N 2.0**

|           | <b>R</b> | <b><math>\sigma^2</math> (x10<sup>-3</sup>)</b> | <b>E0</b> | <b>red chi</b> | <b>r-factor</b> |
|-----------|----------|-------------------------------------------------|-----------|----------------|-----------------|
| <b>2N</b> | 1.91(3)  | 4(4)                                            |           |                |                 |
| <b>2N</b> | 2.06(2)  | 1.5e-6(2)                                       | -4(3)     | 52.1           | 0.11            |
| <b>2N</b> | 1.87(3)  | 3(3)                                            |           |                |                 |
| <b>3N</b> | 2.04(2)  | 1(2)                                            | -6(4)     | 72.1           | 0.15            |
| <b>3N</b> | 1.91(3)  | 6(4)                                            |           |                |                 |
| <b>2N</b> | 2.06(2)  | 3.3e-7(2)                                       | -6(4)     | 61.9           | 0.13            |
| <b>3N</b> | 1.88(4)  | 7(5)                                            |           |                |                 |
| <b>3N</b> | 2.04(3)  | 2(2)                                            | -8(4)     | 87.9           | 0.18            |
| <b>4N</b> | 1.91(4)  | 10(4)                                           |           |                |                 |
| <b>2N</b> | 2.05(3)  | 0.3(21)                                         | -8(4)     | 77.1           | 0.16            |

**Ni-S 2.2 Ni-S 2.4**

|           | <b>R</b> | <b><math>\sigma^2</math> (x10<sup>-3</sup>)</b> | <b>E0</b> | <b>red chi</b> | <b>r-factor</b> |
|-----------|----------|-------------------------------------------------|-----------|----------------|-----------------|
| <b>2S</b> | 1.98(3)  | 8(2)                                            |           |                |                 |
| <b>2S</b> | 2.14(2)  | 3(1)                                            | -25(4)    | 31             | 0.063           |
| <b>3S</b> | 2.18(3)  | 10(2)                                           |           |                |                 |
| <b>2S</b> | 2.48(4)  | 16(7)                                           | -9(5)     | 42.5           | 0.086           |
| <b>3S</b> | 2.47(5)  | 20(7)                                           |           |                |                 |
| <b>3S</b> | 2.18(3)  | 10(2)                                           | -9(5)     | 43.7           | 0.089           |
| <b>4S</b> | 2.18(3)  | 13(2)                                           |           |                |                 |
| <b>2S</b> | 2.49(3)  | 12(4)                                           | -11(4)    | 37.5           | 0.076           |
